# Supplementary material
Source: Springer Nature journal article supplement (https://www.springermedizin.de/resource/supplementary/13054_2013_1942_MOESM1_ESM.DOCX/9711584)
Supplement: MOESM1 [file 9711584]

| Omics | Strengths | Limitations | Clinical Utility |
| --- | --- | --- | --- |
| Genomics |  |  |  |
| SNP | - Unbiased approach when using GWAS - Cost-effective large scale genetic screening - Well-established analysis tools. | - Difficult to find functional and structural gene variants - Only regulatory or coding regions are included | - Theragnostic approach - Risk stratification |
| Epigenetics | - Unbiased approach when using EWAS - Can elucidate the interplay between genetic and environmental factors | - Tissue specific alterations - Different composition of cell types during sepsis - Frequency of epigenetic changes not known - Reverse Causation | - Epigenetic signatures for sepsis diagnosis and/or prognosis - Prediction of therapeutic response |
| Transcriptomics |  |  |  |
| Expression Profiling | - Can generate global view transcriptome alterations - Provide good coverage of genome - Can elucidate alterations in signal transduction pathways during sepsis | - Tissue specific expression of genes - Fails to measure low expression genes with good sensitivity | - mRNA expression signatures for sepsis diagnosis and/or prognosis - Prediction of therapeutic response |
| High-throughput gene sequencing  (e.g. RNA-seq) | - Comprehensive sequence information - Unbiased approach - Estimates abundance of genes in term of copies | - Tissue specific expression of genes | - No clinical utility |
| MicroRNA | - Stable in blood - Suggestive evidence that miRNAs play an important role in regulation of networks - The inclusion of miRNA when interpreting mRNA expression | - Functions not completely understood | - Novel diagnostic and/or prognostic biomarkers in sepsis. - Necessary for correctly interpretation of gene expression. |
| Proteomics | - Provides global or unbiased alteration - Highly sensitive - No need for antibody-based technologies for measuring proteins | - Needs large amount of preprocessing or fractions - Current instruments unable to measure all proteins from complex biological fluids - Inefficient quantification of low expression proteins | - Novel diagnostic and/or prognostic biomarkers in sepsis. - Prediction of therapeutic response |
| Metabolomics | - Relatively few targets - Good translation to existing lab technolgy | - Difficulty in identifying small molecules - Diverse physical and chemical properties and thus no single extraction tool | - Novel diagnostic and/or prognostic biomarkers in sepsis. - Prediction of therapeutic response - Disease progression |
